# Supplementary material for: Morphological and molecular control of chemical vapor deposition (CVD) polymerized polythiophene thin films
Source: Royal Society of Chemistry journal article supplement (doi:10.1039/d4ra06472k), 2024-01-01
Supplement: d4ra06472k1.pdf [file d4ra06472k1.pdf]

## Supporting Information

# Morphological and Molecular Control of oCVD Polythiophene Thin Films

Phil M. Smith, Laisuo Su, Yanfei Xu, B. Reeja-Jayan, and Sheng Shen\*

Department of Mechanical Engineering, Carnegie Mellon University, Pittsburgh PA 15232 USA

### UV-Vis absorption

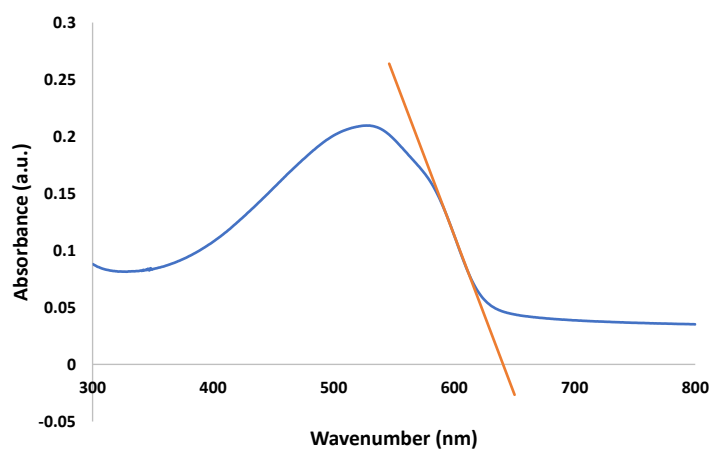

Figure S1: UV-Vis absorption spectra of oCVD PT film deposited on a plain silicon substrate at 150 mT. The tangent to the band edge or the absorption edge wavelength ( $\lambda_{ab}$ ) is 640.51 nm and the optical band gap is given by  $E_g = hc/\lambda_a = 1.94$  eV.

### Morphology

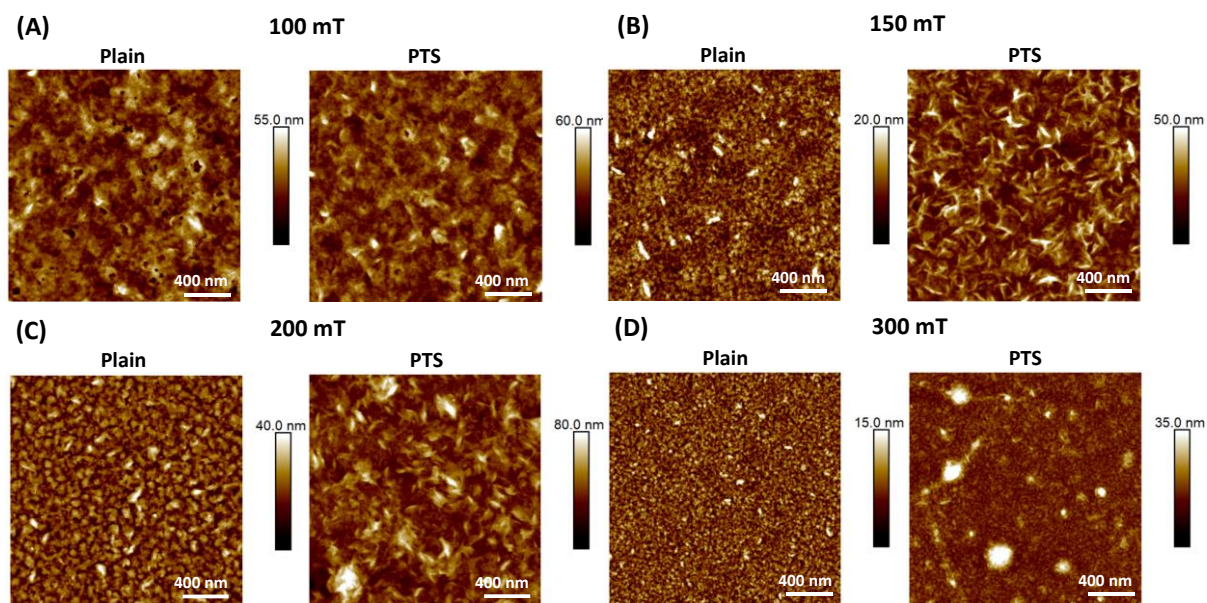

Figure S2: 2  $\mu\text{m}$  x 2  $\mu\text{m}$  AFM scans of oCVD PT films deposited on plain and PTS substrates at different deposition pressures.

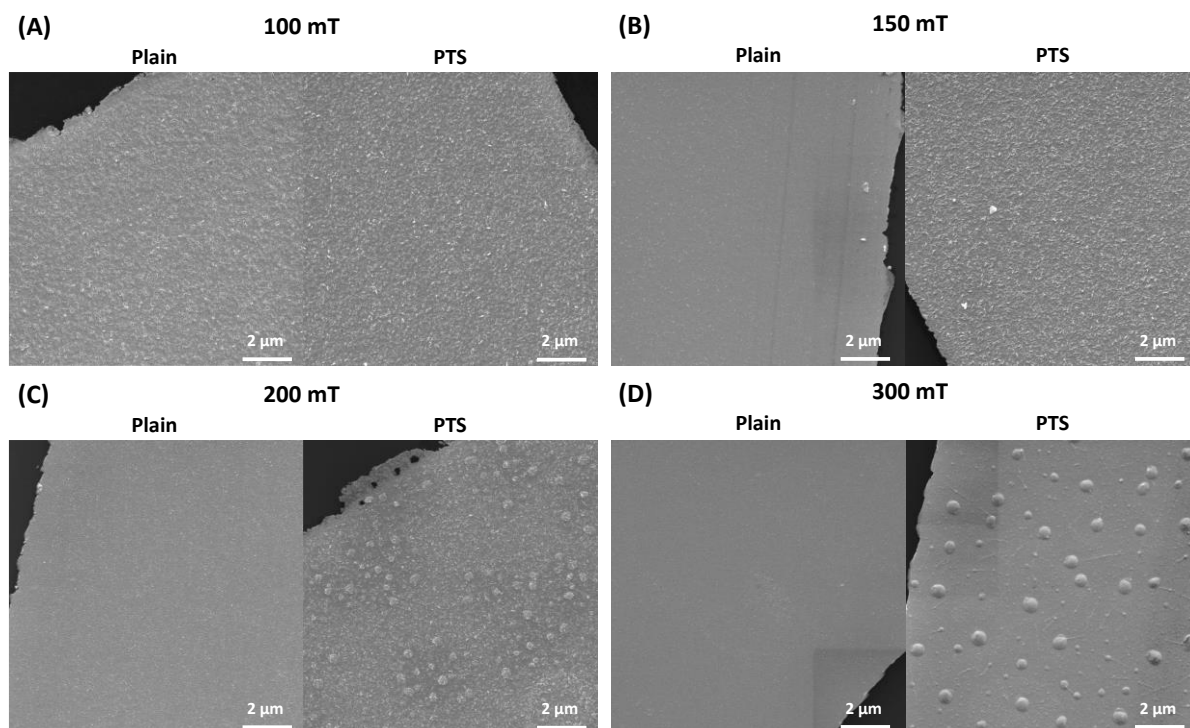

Figure S3: SEM images of oCVD PT films deposited on plain and PTS substrates at different deposition pressures.
